# Supplementary material for: lncRNA HCG11 Promotes Colorectal Cancer Cell Malignant Behaviors via Sponging miR-26b-5p
Source: Hindawi journal article supplement (doi:10.1155/2023/9011232), 2023-02-23

A

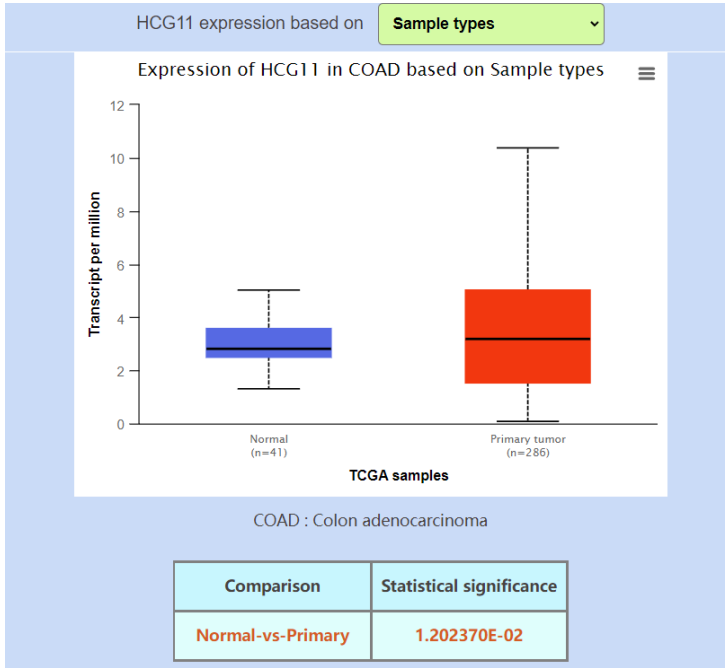

B

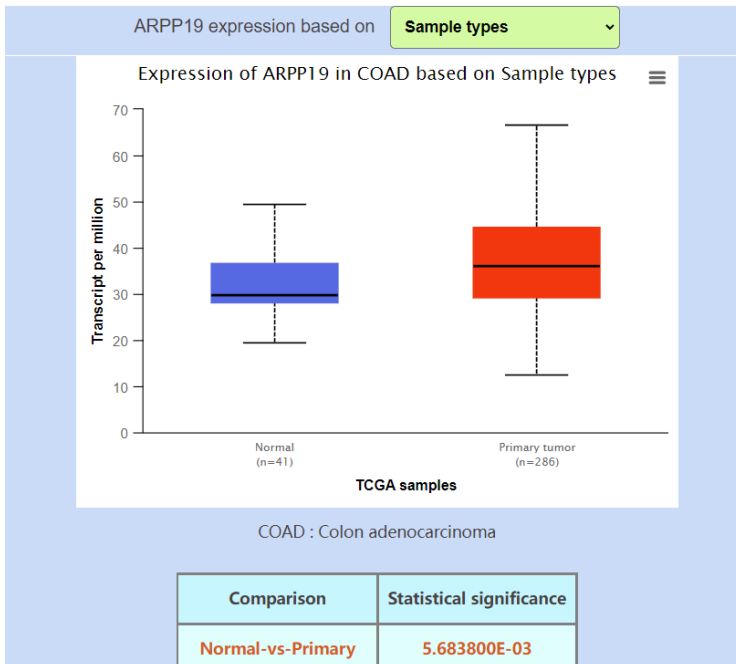

Supplement: f1 [file 9011232.f1.pdf]
